# Supplementary material
Source: MDPI journal article supplement (https://www.mdpi.com/2076-3417/11/16/7323)
Supplement: s1 [file s1]

解剖学実習 AR アンケート 体験前

学年\_\_\_\_\_年

No.

以下のものを記入して下さい。

外頸動脈の前壁枝：

外頸動脈の終枝：

顔面動脈の枝：

顎関節を構成する骨：

問1. AR技術を体験してみてどうでしたか。その理由も記載して下さい。

- a. とても良かった      b. 良かった      c. どちらでもない  
d. あまり良くなかった      e. まったく良くなかった

(理由：\_\_\_\_\_)

問2. 今回の体験を通して、解剖学的構造をどの程度理解したと思いますか。

- a. かなり理解できた      b. 理解できた      c. どちらでもない  
d. あまり理解できなかった      e. まったく理解できなかった

(理由：\_\_\_\_\_)

問3. 今回のAR技術で確認できた情報量についてどう思いますか。その理由も記載してください。

- a. 十分であった      b. まあまあ十分であった      c. どちらでもない  
d. やや不足であった      e. 不足であった

(理由：\_\_\_\_\_)

問4. 今回体験してみて、歯科医学教育にAR技術の応用は必要だと思いましたか。その理由も記載して下さい。

- a. 絶対必要      b. 必要かもしれない      c. わからない  
d. 必要ないかもしれない      e. 絶対必要ない

(理由：\_\_\_\_\_)

問5. 今回体験してみて、解剖実習以外でAR技術を取り入れた方が良い科目はありますか。(自由記載)

(\_\_\_\_\_)

問6. 今回体験してみて、AR技術を取り入れた解剖実習はいつ必要だと思いましたか。その理由も記載して下さい。

- a. 1年生      b. 2年生      c. 3年生      d. 4年生  
e. 5年生      f. 6年生      g. 卒業後

(理由：\_\_\_\_\_)

解剖学実習 AR アンケート 体験前

学年\_\_\_\_\_年

No.

以下のものを記入して下さい。

外頸動脈の前壁枝：

外頸動脈の終枝：

顔面動脈の枝：

顎関節を構成する骨：

問1. これまでにAR技術の体験(勉強に関係なくても)をしたことがありますか。

- a. ない
- b. ある  
⇒(内容: )

問4. 歯科医学教育にAR技術の応用は必要だと思いますか。その理由も記載して下さい。

- a. 絶対必要
- b. 必要かもしれない
- c. わからない
- d. 必要ないかもしれない
- e. 絶対必要ない

(理由: )

問2. これまでにテキストのみを利用した講義(解剖学)で困ったこと・理解しづかったことはありますか。

- a. ない
- b. ある  
⇒(内容: )

問5. AR技術を取り入れた解剖実習はいつ必要だと思いますか。その理由も記載して下さい。

- a. 1年生
- b. 2年生
- c. 3年生
- d. 4年生
- e. 5年生
- f. 6年生
- g. 卒業後

(理由: )

問3. これまでにテキストのみを利用した講義(解剖学以外)で困ったこと・理解しづかったことはありますか。

- a. ない
- b. ある  
⇒(科目名: )  
(内容: )
